# Supplementary material for: Hydrophobic induced supramolecular self-organization of tetrahedral units based on van der Waals interactions
Source: Royal Society of Chemistry journal article supplement (doi:10.1039/b509017b), 2005-10-03

## Hydrophobic induced supramolecular self-organization of tetrahedral units based on van der Waals interactions

Frédéric Lerouge, Geneviève Cerveau, Robert J.P. Corriu.\*

Laboratoire de Chimie Moléculaire et Organisation du solide, UMR 5637, Université  
Montpellier II, cc 007, Place E. Bataillon, F-34095 Montpellier Cedex 5, France.

Fax : (+ 33) 4 67 14 38 52

E-mail: [corriu@univ-montp2.fr](mailto:corriu@univ-montp2.fr)

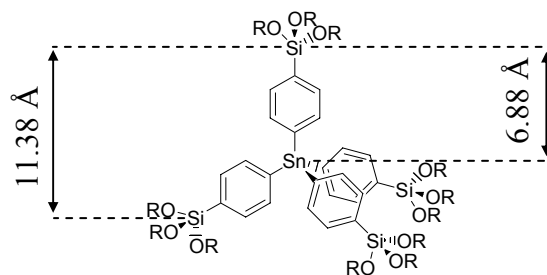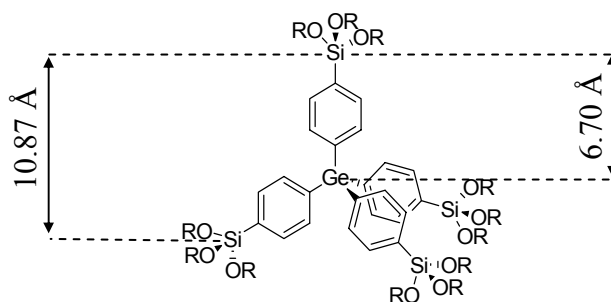

Supplement: b509017b.pdf [file b509017b.pdf]
